# Supplementary figures and images for: Effect of silver and cobalt on transparent conducting CdO thin films: tuning the optoelectronic properties
Source: Royal Society of Chemistry journal article supplement (doi:10.1039/d4ma00918e), 2024-12-06

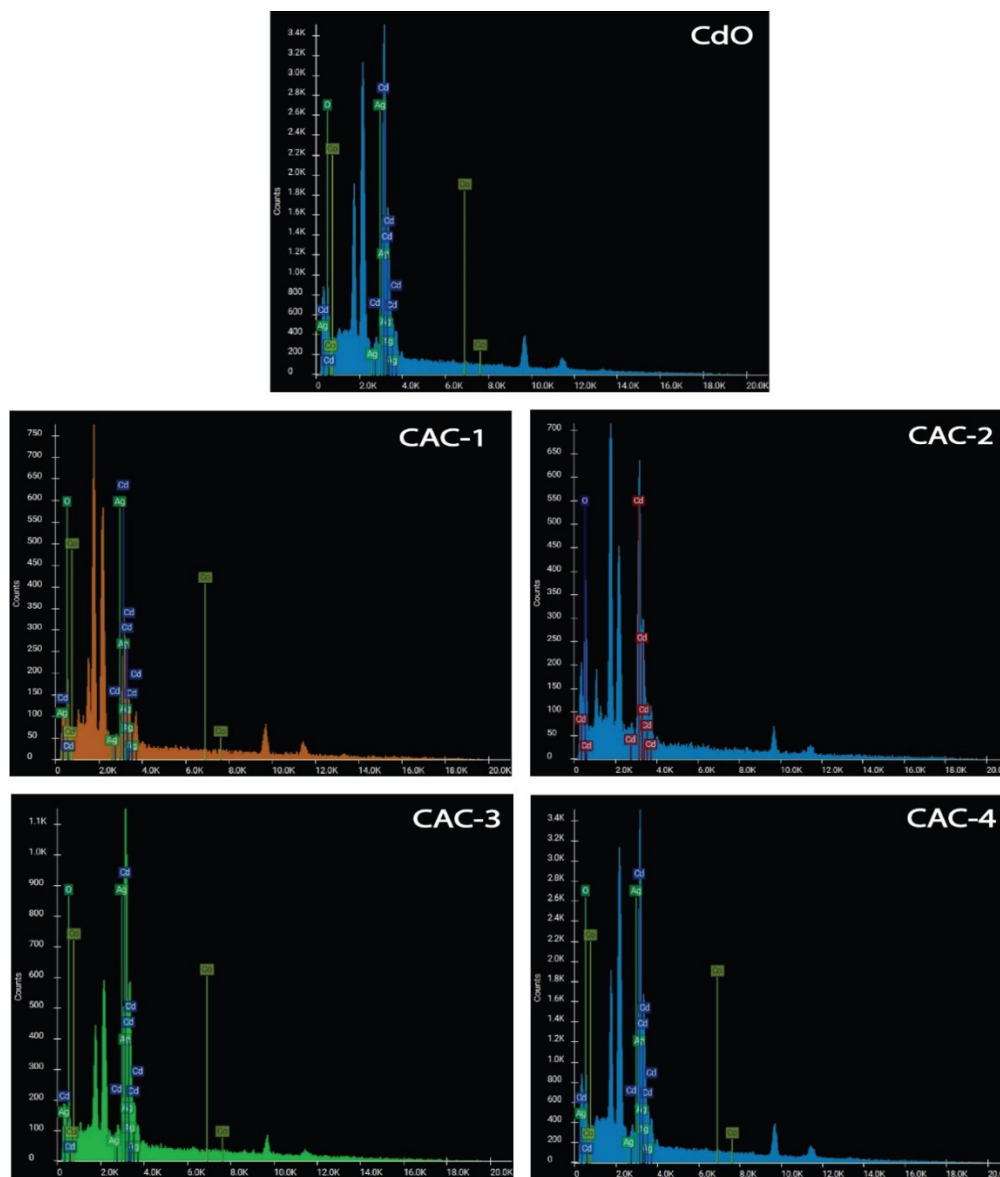

**Figure 1:** EDS graph of pure CdO and the Ag-Co dual-doped CdO thin films.

Supplement: d4ma00918e1.pdf [file d4ma00918e1.pdf]
